# Supplementary material
Source: Springer Nature journal article supplement (http://www.springermedizin.de/resource/supplementary/12967_2012_1492_MOESM4_ESM.pdf/9574862)

**a**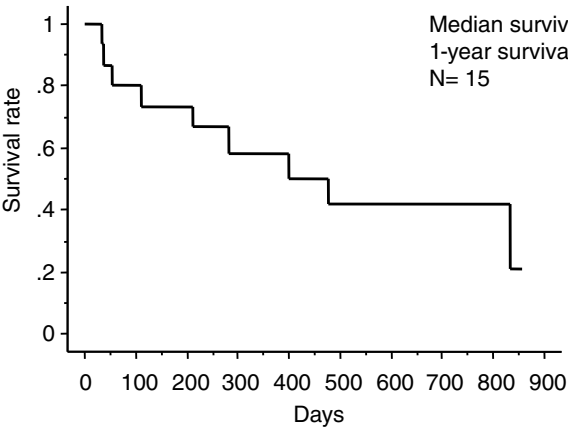**b**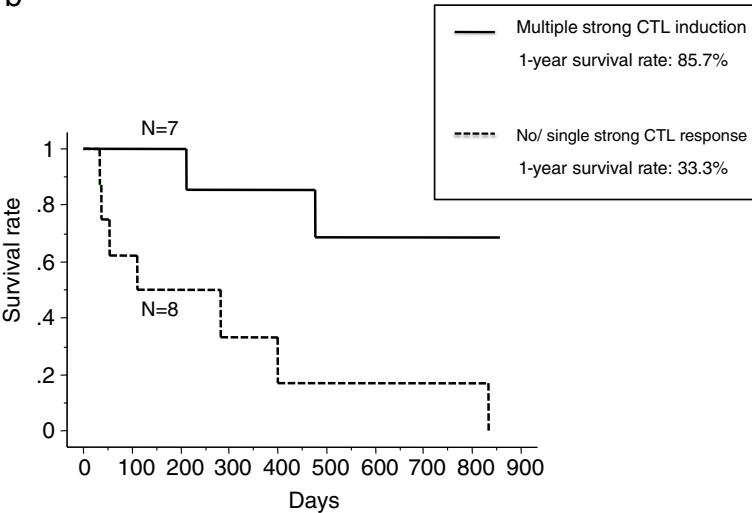

Supplement: MOESM4 [file 9574862]
